# Supplementary material for: 1,2,3-Triazole-Benzofused Molecular Conjugates as Potential Antiviral Agents against SARS-CoV-2 Virus Variants
Source: MDPI journal article supplement (doi:10.3390/life12091341), 2022-08-29
Supplement: s1 [file s1]

# 1,2,3-Triazole-benzofused molecular conjugates as potential antiviral agents against SARS-CoV-2 virus variants

## Supplementray data

**Table S1.** In vitro assay of the remaining activity % of omicron spike proteins after using the synthesized 1,2,3-Triazole-benzofused compounds

| Tested compounds | Tested concentrations (nM) |      |      |     |      |
|------------------|----------------------------|------|------|-----|------|
|                  | 100                        | 200  | 500  | 750 | 1000 |
| Ceftazidime      | 89                         | 68   | 54   | 44  | 34   |
| <b>4</b>         | 73.1                       | 40   | 20   | 10  | 8    |
| <b>5</b>         | 82                         | 38.7 | 30   | 20  | 16   |
| <b>6</b>         | 79                         | 45.6 | 29   | 16  | 10   |
| <b>7</b>         | 85                         | 43   | 40   | 35  | 30   |
| <b>9</b>         | 65.8                       | 30.4 | 10.3 | 5.1 | 2    |
| <b>12</b>        | 94                         | 90   | 82   | 74  | 59   |

**Table S2.** In vitro assay of the remaining activity % of SARS-CoV-2 spike proteins after using the synthesized 1,2,3-Triazole-benzofused compounds

| Tested compounds | Tested concentrations (nM) |      |      |      |      |
|------------------|----------------------------|------|------|------|------|
|                  | 100                        | 200  | 500  | 750  | 1000 |
| Ceftazidime      | 99                         | 79   | 59   | 55.1 | 45.2 |
| <b>4</b>         | 74.6                       | 46   | 21.9 | 20   | 18   |
| <b>5</b>         | 83.8                       | 70.2 | 45.8 | 32   | 26   |
| <b>6</b>         | 79.9                       | 65.4 | 38.2 | 27   | 20   |
| <b>7</b>         | 86.1                       | 77.2 | 58.6 | 44   | 40   |
| <b>9</b>         | 67.1                       | 32.7 | 11.4 | 12   | 5    |
| <b>12</b>        | 95.9                       | 92.5 | 82   | 82   | 70   |
